# Supplementary material for: Attendance trends threaten future operations of America’s state park systems
Source: PubMed Central journal article supplement — Proc Natl Acad Sci U S A. 2019 Jun 3;116(26):12775–80. doi: 10.1073/pnas.1902314116 (PMC6600924; doi:10.1073/pnas.1902314116), 2019-06-03
Supplement: pnas.1902314116.sapp.pdf [file pnas.1902314116.sapp.pdf]

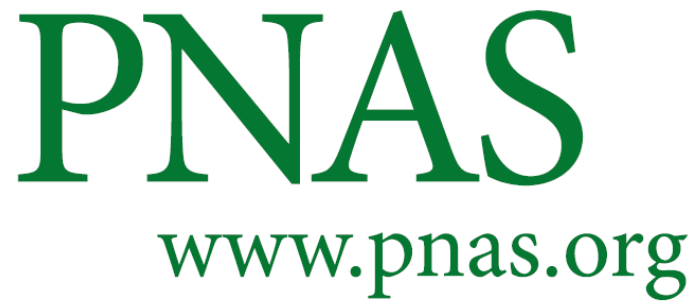

## **Supplementary Information for**

**Attendance Trends Threaten Future Operations of America's State Park Systems**

Jordan W. Smith, Emily J. Wilkins, Yu-Fai Leung

Jordan W. Smith

Email: [jordan.smith@usu.edu](mailto:jordan.smith@usu.edu)

### **This PDF file includes:**

Table S1  
Table S2  
Fig. S1

**Table S1. Comparison of stochastic frontier models fit using different specifications**

| Variable                                           | A. True Random Effects (Exponential Inefficiency Distribution) (1) |                    |           |        | B. True Random Effects (Half-normal Inefficiency Distribution) (1) |                     |           |                     | C. True Fixed Effects (2) |                     |                     |        | D. Maximum Likelihood Random-effects Time-varying Inefficiency Effects (3) |                     |           |                     | E. Maximum Likelihood Random-effects Time-varying Efficiency Decay (4) |                     |           |                     | F. ML Random-effects Flexible Time-varying Efficiency (5) |                     |           |                     |
|----------------------------------------------------|--------------------------------------------------------------------|--------------------|-----------|--------|--------------------------------------------------------------------|---------------------|-----------|---------------------|---------------------------|---------------------|---------------------|--------|----------------------------------------------------------------------------|---------------------|-----------|---------------------|------------------------------------------------------------------------|---------------------|-----------|---------------------|-----------------------------------------------------------|---------------------|-----------|---------------------|
|                                                    | Coef.                                                              | S. E.              | 95% C. I. |        | Coef.                                                              | S. E.               | 95% C. I. |                     | Coef.                     | S. E.               | 95% C. I.           |        | Coef.                                                                      | S. E.               | 95% C. I. |                     | Coef.                                                                  | S. E.               | 95% C. I. |                     | Coef.                                                     | S. E.               | 95% C. I. |                     |
| <i>ln</i> Attendance (visitor-hours) / acre        | <b>0.250</b>                                                       | 0.015              | 0.221     | 0.279  | <b>0.244</b>                                                       | 0.017               | 0.211     | 0.276               | <b>0.255</b>              | 0.012               | 0.231               | 0.279  | <b>0.233</b>                                                               | 0.012               | 0.210     | 0.255               | <b>0.229</b>                                                           | 0.011               | 0.207     | 0.251               | <b>0.230</b>                                              | 0.011               | 0.207     | 0.252               |
| <i>ln</i> Capital expenditures / acre <sup>b</sup> | <b>0.027</b>                                                       | 0.004              | 0.019     | 0.035  | <b>0.029</b>                                                       | 0.004               | 0.021     | 0.038               | <b>0.070</b>              | 0.004               | 0.063               | 0.077  | <b>0.045</b>                                                               | 0.006               | 0.034     | 0.057               | <b>0.045</b>                                                           | 0.006               | 0.033     | 0.057               | <b>0.044</b>                                              | 0.006               | 0.033     | 0.056               |
| <i>ln</i> Revenue / acre <sup>b</sup>              | <b>0.064</b>                                                       | 0.008              | 0.049     | 0.079  | <b>0.051</b>                                                       | 0.007               | 0.037     | 0.065               | <b>0.157</b>              | 0.007               | 0.144               | 0.170  | <b>0.135</b>                                                               | 0.010               | 0.116     | 0.153               | <b>0.146</b>                                                           | 0.010               | 0.127     | 0.165               | <b>0.147</b>                                              | 0.010               | 0.127     | 0.166               |
| <i>ln</i> Labor (person-hours) / acre <sup>c</sup> | <b>0.425</b>                                                       | 0.016              | 0.394     | 0.455  | <b>0.385</b>                                                       | 0.019               | 0.348     | 0.422               | <b>0.502</b>              | 0.013               | 0.476               | 0.528  | <b>0.464</b>                                                               | 0.016               | 0.432     | 0.496               | <b>0.452</b>                                                           | 0.016               | 0.421     | 0.483               | <b>0.452</b>                                              | 0.016               | 0.421     | 0.483               |
| Precipitation (cm / year)                          | -2.5e <sup>-4</sup>                                                | 3.7e <sup>-4</sup> | -0.001    | 0.000  | -0.001                                                             | 4.8e <sup>-04</sup> | -0.002    | 3.4e <sup>-04</sup> | <b>0.001</b>              | 3.2e <sup>-04</sup> | 2.1e <sup>-04</sup> | 0.001  | -3.6e <sup>-04</sup>                                                       | 2.5e <sup>-04</sup> | -0.001    | 1.3e <sup>-04</sup> | -1.1e <sup>-04</sup>                                                   | 2.4e <sup>-04</sup> | -0.001    | 3.6e <sup>-04</sup> | -1.1e <sup>-04</sup>                                      | 2.4e <sup>-04</sup> | -0.001    | 3.6e <sup>-04</sup> |
| Average temperature (°C)                           | <b>0.003</b>                                                       | 1.7e <sup>-3</sup> | 0.001     | 0.006  | <b>0.004</b>                                                       | 0.002               | 0.001     | 0.007               | <b>0.032</b>              | 0.002               | 0.029               | 0.035  | <b>0.024</b>                                                               | 0.002               | 0.021     | 0.028               | <b>0.024</b>                                                           | 0.002               | 0.021     | 0.027               | <b>0.024</b>                                              | 0.002               | 0.021     | 0.027               |
| Constant                                           | <b>3.097</b>                                                       | 0.069              | 2.961     | 3.232  | <b>3.512</b>                                                       | 0.091               | 3.335     | 3.690               |                           |                     |                     |        | <b>2.473</b>                                                               | 0.055               | 2.365     | 2.581               | <b>2.252</b>                                                           | 0.052               | 2.150     | 2.353               | <b>2.253</b>                                              | 0.052               | 2.151     | 2.355               |
| Parameter                                          |                                                                    |                    |           |        |                                                                    |                     |           |                     |                           |                     |                     |        |                                                                            |                     |           |                     |                                                                        |                     |           |                     |                                                           |                     |           |                     |
| <i>U</i> <sup>0</sup> constant                     | <b>-3.401</b>                                                      | 0.092              | -3.582    | -3.220 | <b>-0.944</b>                                                      | 0.042               | -1.027    | -0.861              | <b>-8.630</b>             | 0.056               | -8.741              | -8.520 | <b>3.176</b>                                                               | 0.058               | 3.062     | 3.289               | —                                                                      | —                   | —         | —                   | —                                                         | —                   | —         | —                   |
| <i>V</i> <sup>0</sup> constant                     | <b>-3.485</b>                                                      | 0.059              | -3.601    | -3.369 | <b>-4.087</b>                                                      | 0.118               | -4.318    | -3.856              | <b>-3.431</b>             | —                   | —                   | —      | <b>-2.433</b>                                                              | 0.048               | -2.527    | -2.339              | —                                                                      | —                   | —         | —                   | —                                                         | —                   | —         | —                   |
| <i>M</i> <sup>0</sup> constant                     | —                                                                  | —                  | —         | —      | —                                                                  | —                   | —         | —                   | —                         | —                   | —                   | —      | <b>-110.771</b>                                                            | —                   | —         | —                   | —                                                                      | —                   | —         | —                   | —                                                         | —                   | —         | —                   |
| <i>ln</i> σ <sup>2</sup>                           | —                                                                  | —                  | —         | —      | —                                                                  | —                   | —         | —                   | —                         | —                   | —                   | —      | —                                                                          | —                   | —         | —                   | <b>6.536</b>                                                           | 0.804               | 4.960     | 8.112               | —                                                         | —                   | —         | —                   |
| <i>ilgt</i> γ                                      | —                                                                  | —                  | —         | —      | —                                                                  | —                   | —         | —                   | —                         | —                   | —                   | —      | —                                                                          | —                   | —         | —                   | <b>8.743</b>                                                           | 0.805               | 7.165     | 10.321              | —                                                         | —                   | —         | —                   |
| μ                                                  | —                                                                  | —                  | —         | —      | —                                                                  | —                   | —         | —                   | —                         | —                   | —                   | —      | —                                                                          | —                   | —         | —                   | -985.225                                                               | 782.922             | -2519.724 | 549.274             | —                                                         | —                   | —         | —                   |
| η                                                  | —                                                                  | —                  | —         | —      | —                                                                  | —                   | —         | —                   | —                         | —                   | —                   | —      | —                                                                          | —                   | —         | —                   | <b>-2.190</b>                                                          | 0.167               | -2.517    | -1.862              | —                                                         | —                   | —         | —                   |
| <i>b</i>                                           | —                                                                  | —                  | —         | —      | —                                                                  | —                   | —         | —                   | —                         | —                   | —                   | —      | —                                                                          | —                   | —         | —                   | —                                                                      | —                   | —         | —                   | <b>5.558</b>                                              | —                   | —         | —                   |
| <i>c</i>                                           | —                                                                  | —                  | —         | —      | —                                                                  | —                   | —         | —                   | —                         | —                   | —                   | —      | —                                                                          | —                   | —         | —                   | —                                                                      | —                   | —         | —                   | <b>-0.166</b>                                             | 1.8e <sup>-04</sup> | -0.167    | -0.166              |
| θ constant                                         | <b>0.319</b>                                                       | 0.023              | 0.274     | 0.363  | <b>0.280</b>                                                       | 0.016               | 0.249     | 0.310               | —                         | —                   | —                   | —      | —                                                                          | —                   | —         | —                   | —                                                                      | —                   | —         | —                   | —                                                         | —                   | —         | —                   |
| σ <sub>U</sub>                                     | <b>0.183</b>                                                       | 0.008              | 0.167     | 0.200  | <b>0.624</b>                                                       | 0.013               | 0.598     | 0.650               | <b>0.013</b>              | 3.8e <sup>-04</sup> | 0.013               | 0.014  | <b>4.893</b>                                                               | 0.141               | 4.624     | 5.178               | —                                                                      | —                   | —         | —                   | <b>2.636</b>                                              | 0.269               | 2.042     | 3.119               |
| σ <sub>V</sub>                                     | <b>0.175</b>                                                       | 0.005              | 0.165     | 0.186  | <b>0.130</b>                                                       | 0.008               | 0.115     | 0.145               | 0.180                     | —                   | —                   | —      | <b>0.296</b>                                                               | 0.007               | 0.283     | 0.310               | —                                                                      | —                   | —         | —                   | <b>0.333</b>                                              | 0.006               | 0.321     | 0.344               |
| λ                                                  | <b>1.043</b>                                                       | 0.012              | 1.020     | 1.066  | <b>4.816</b>                                                       | 0.017               | 4.782     | 4.849               | 0.074                     | —                   | —                   | —      | <b>16.517</b>                                                              | 0.144               | 16.234    | 16.799              | —                                                                      | —                   | —         | —                   | <b>7.918</b>                                              | 0.269               | 7.391     | 8.445               |
| σ <sup>2</sup>                                     | —                                                                  | —                  | —         | —      | —                                                                  | —                   | —         | —                   | —                         | —                   | —                   | —      | —                                                                          | —                   | —         | —                   | 689.664                                                                | 554.550             | 142.626   | 3334.860            | —                                                         | —                   | —         | —                   |
| γ                                                  | —                                                                  | —                  | —         | —      | —                                                                  | —                   | —         | —                   | —                         | —                   | —                   | —      | —                                                                          | —                   | —         | —                   | 1.000                                                                  | 0.000               | 0.999     | 1.000               | —                                                         | —                   | —         | —                   |
| σ <sub>U</sub> <sup>2</sup>                        | —                                                                  | —                  | —         | —      | —                                                                  | —                   | —         | —                   | —                         | —                   | —                   | —      | —                                                                          | —                   | —         | —                   | 689.554                                                                | 554.550             | -397.344  | 1776.452            | <b>6.949</b>                                              | 1.418               | 4.170     | 9.727               |
| σ <sub>V</sub> <sup>2</sup>                        | —                                                                  | —                  | —         | —      | —                                                                  | —                   | —         | —                   | —                         | —                   | —                   | —      | —                                                                          | —                   | —         | —                   | 0.110                                                                  | 0.004               | 0.103     | 0.117               | <b>0.111</b>                                              | 0.004               | 0.103     | 0.118               |
| Summary Statistic                                  |                                                                    |                    |           |        |                                                                    |                     |           |                     |                           |                     |                     |        |                                                                            |                     |           |                     |                                                                        |                     |           |                     |                                                           |                     |           |                     |
| Wald χ <sup>2</sup> (6)                            | 3040.64                                                            |                    |           |        | 2098.85                                                            |                     |           |                     | 7352.56                   |                     |                     |        | 13883.16                                                                   |                     |           |                     | 15202.76                                                               |                     |           |                     | 15066.42                                                  |                     |           |                     |
| Log simulated-likelihood                           | -127.19                                                            |                    |           |        | -766.51                                                            |                     |           |                     | -59960.00                 |                     |                     |        | -680.34                                                                    |                     |           |                     | -583.63                                                                |                     |           |                     | -634.67                                                   |                     |           |                     |
| Number of pseudo-random draws used in each model   | 250                                                                |                    |           |        | 250                                                                |                     |           |                     | —                         |                     |                     |        | —                                                                          |                     |           |                     | —                                                                      |                     |           |                     | —                                                         |                     |           |                     |

**Bold** values are significant at the 0.05 level; N = 1,700 (50 states × 34 years).

**Table S2. Deviation of coefficient estimates generated by the true random effects model (with an exponential inefficiency distribution) from estimates generated by other specifications (Table S1)**

| Variable                                           | Min.   | Max.  |
|----------------------------------------------------|--------|-------|
| <i>ln</i> Attendance (visitor-hours) / acre        | 0.9 %  | 1.0 % |
| <i>ln</i> Capital expenditures / acre <sup>b</sup> | 1.1 %  | 2.6 % |
| <i>ln</i> Revenue / acre <sup>b</sup>              | 0.8 %  | 2.5 % |
| <i>ln</i> Labor (person-hours) / acre <sup>c</sup> | 0.9 %  | 1.2 % |
| Precipitation (cm / year)                          | -3.3 % | 2.4 % |
| Average temperature (°C)                           | 1.2 %  | 9.7 % |

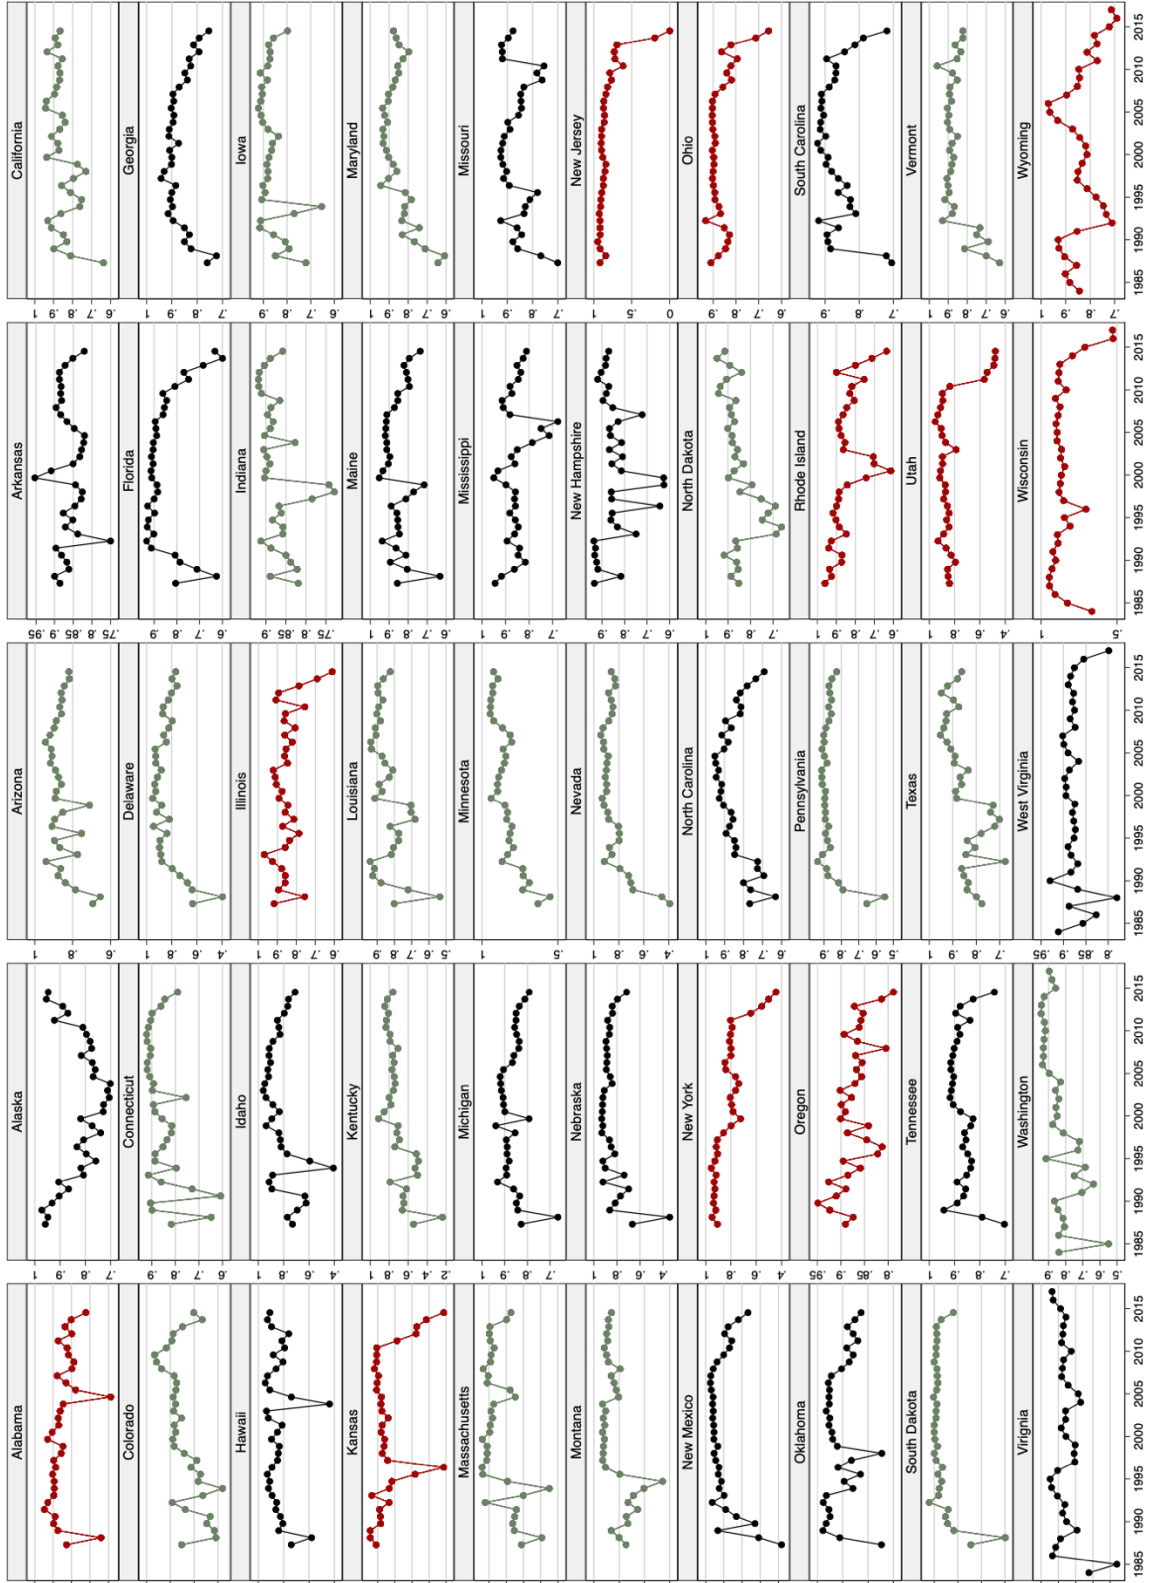

**Fig. S1.** Estimated cost efficiencies by state (1984-2017). Cost efficiencies range from 1.0 to 0.0, where 1.0 indicates a more cost-efficient state park and constant returns to scale. Dark red estimates indicate states whose estimated cost efficiencies are *negatively* and significantly correlated with time. Green estimates indicate states whose estimated cost efficiencies are *positively* and significantly correlated with time.

## References

1. Greene W (2005) Fixed and random effects in stochastic frontier models. *Journal of Productivity Analysis* 23(1):7–32.
2. Greene W (2005) Reconsidering heterogeneity in panel data estimators of the stochastic frontier model. *Journal of Econometrics* 126(2):269–303.
3. Battese GE, Coelli TJ (1988) Prediction of firm-level technical efficiencies with a generalized frontier production function and panel data. *Journal of Econometrics* 38(3):387–399.
4. Battese GE, Coelli TJ (1992) Frontier production functions, technical efficiency and panel data: With application to paddy farmers in India. *Journal of Productivity Analysis* 3:153–169.
5. Kumbhakar SC (1990) Production frontiers, panel data, and time-varying technical inefficiency. *Journal of Econometrics* 46(1–2):201–211.
